# Supplementary material for: Pathogenic, glycolytic PD-1+ B cells accumulate in the hypoxic RA joint
Source: PubMed Central journal article supplement (PMC7710281; doi:10.1172/jci.insight.139032), 2020-11-05
Supplement: jciinsight-5-139032-s240.pdf [file jciinsight-5-139032-s240.pdf]

## Sup. Figure 1

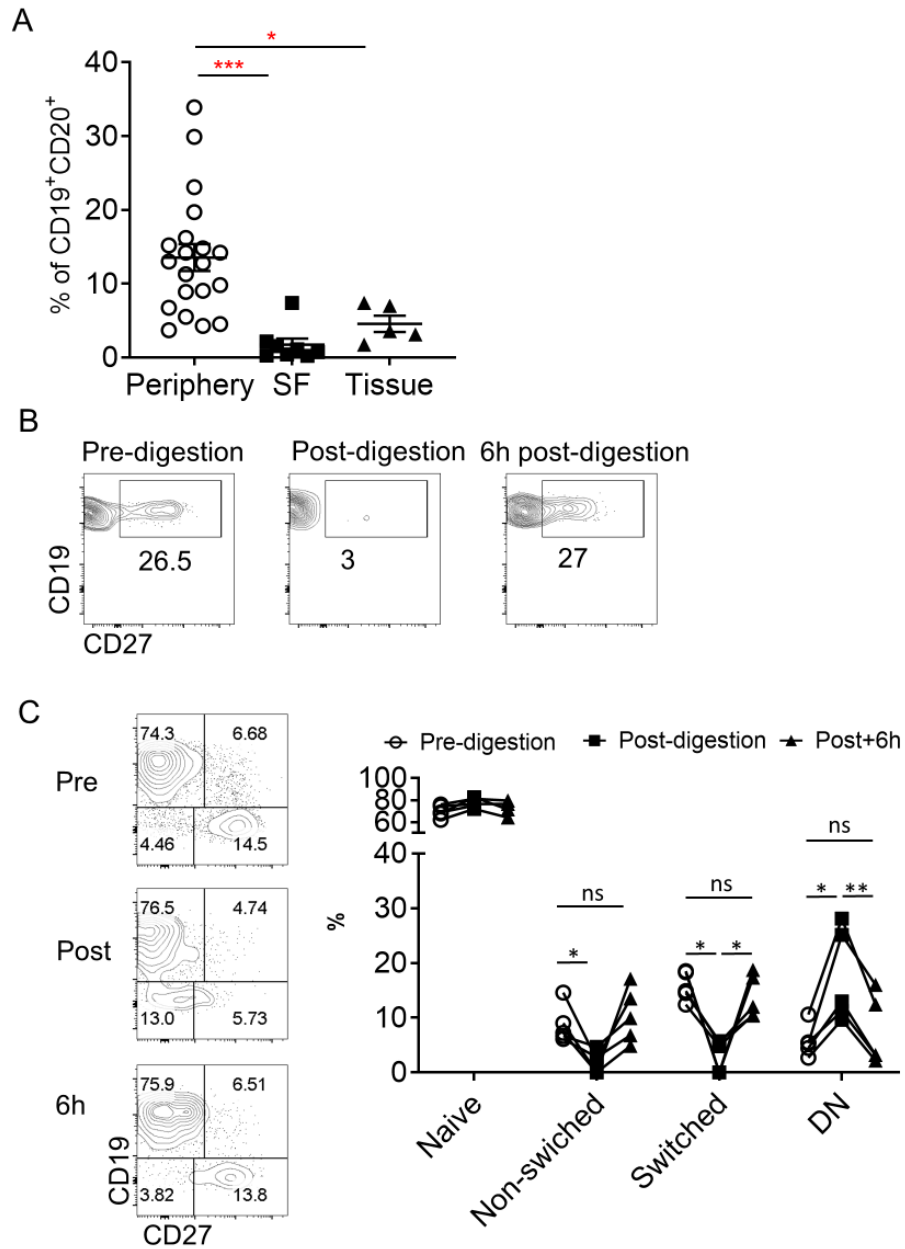

### Supplementary Figure 1. RA patient synovial tissue and peripheral blood B cell frequency analysis.

(A). Frequency of CD19<sup>+</sup>CD20<sup>+</sup> B cells in the periphery (n=20), synovial fluid (n=8) and synovial tissue (n=5) of RA patients. (B). Representative analysis of CD27 expression by B cells pre-, post- and 6 hours post-enzymatic digestion.

## Sup. Figure 2

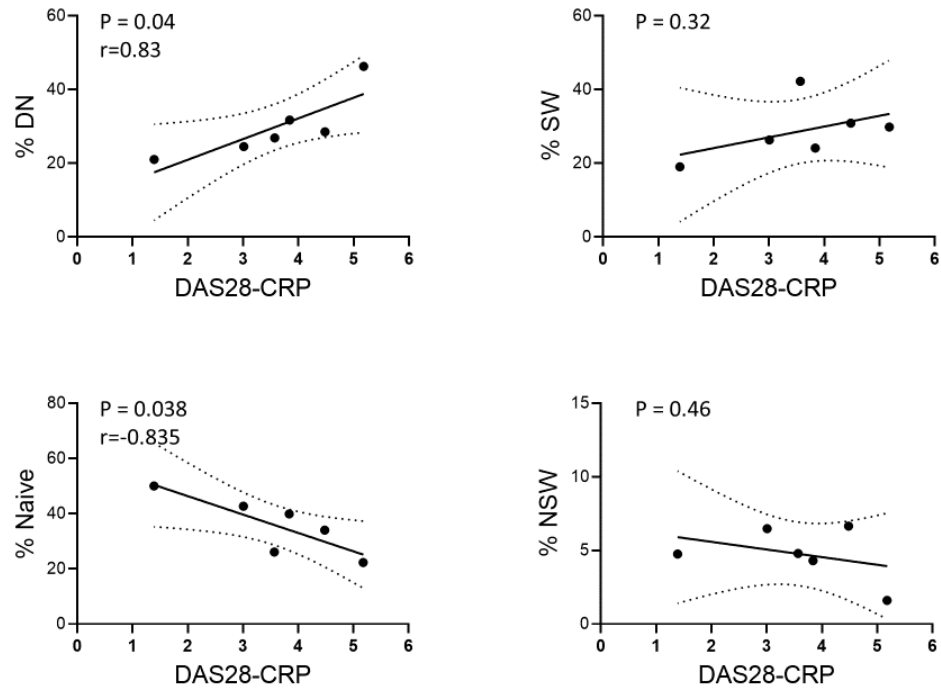

### Supplementary Figure 2. RA synovial tissue accumulation of memory B cells.

Correlations of RA patient synovial tissue B cells and corresponding patient's DAS18-CRP. Each symbol represents an individual sample, 95% confidence bars and best fit line are shown, Pearson correlation coefficients were calculated and  $p < 0.05^*$  were considered significant.

## Sup. Figure 3

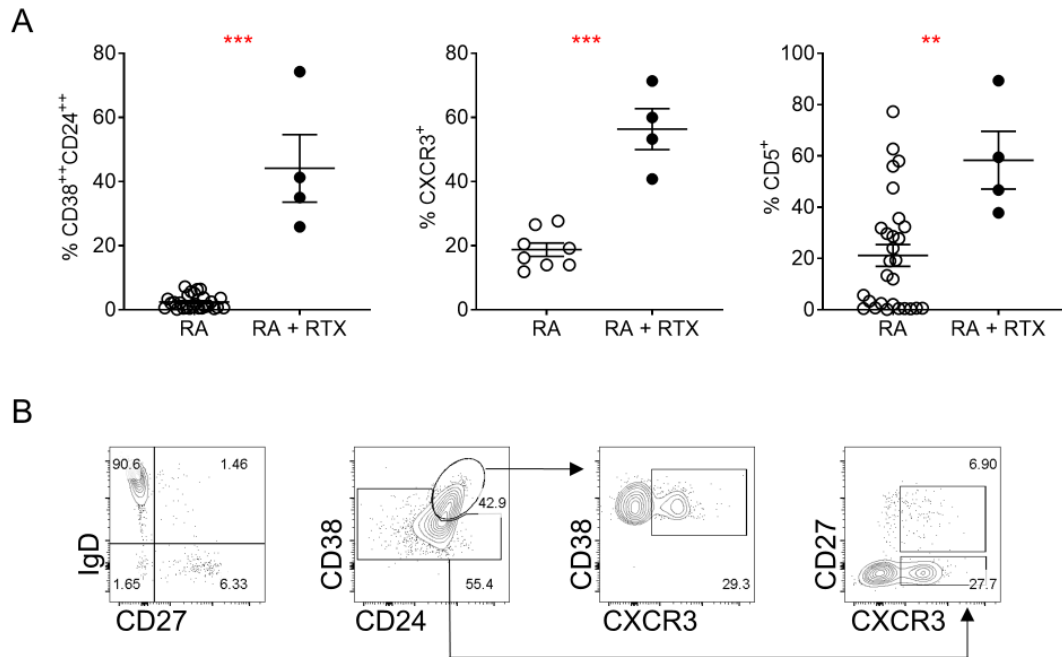

### Supplementary Figure 3. Expression of CXCR3 by returning RA patient B cells following depletion with rituximab.

Frequency of transitional (CD38<sup>++</sup>CD24<sup>++</sup>), CXCR3<sup>+</sup> and CD5<sup>+</sup> B cells returning 6 to 12 months following Rituximab infusion (n=4) and non-Rituximab treated RA patient controls (n=8-28). All data are presented as mean ± SEM, each symbol represents an individual sample. Statistical analysis was performed by using two tailed standard Student's t test, p<0.05\* were considered significant.

## Sup. Figure 4

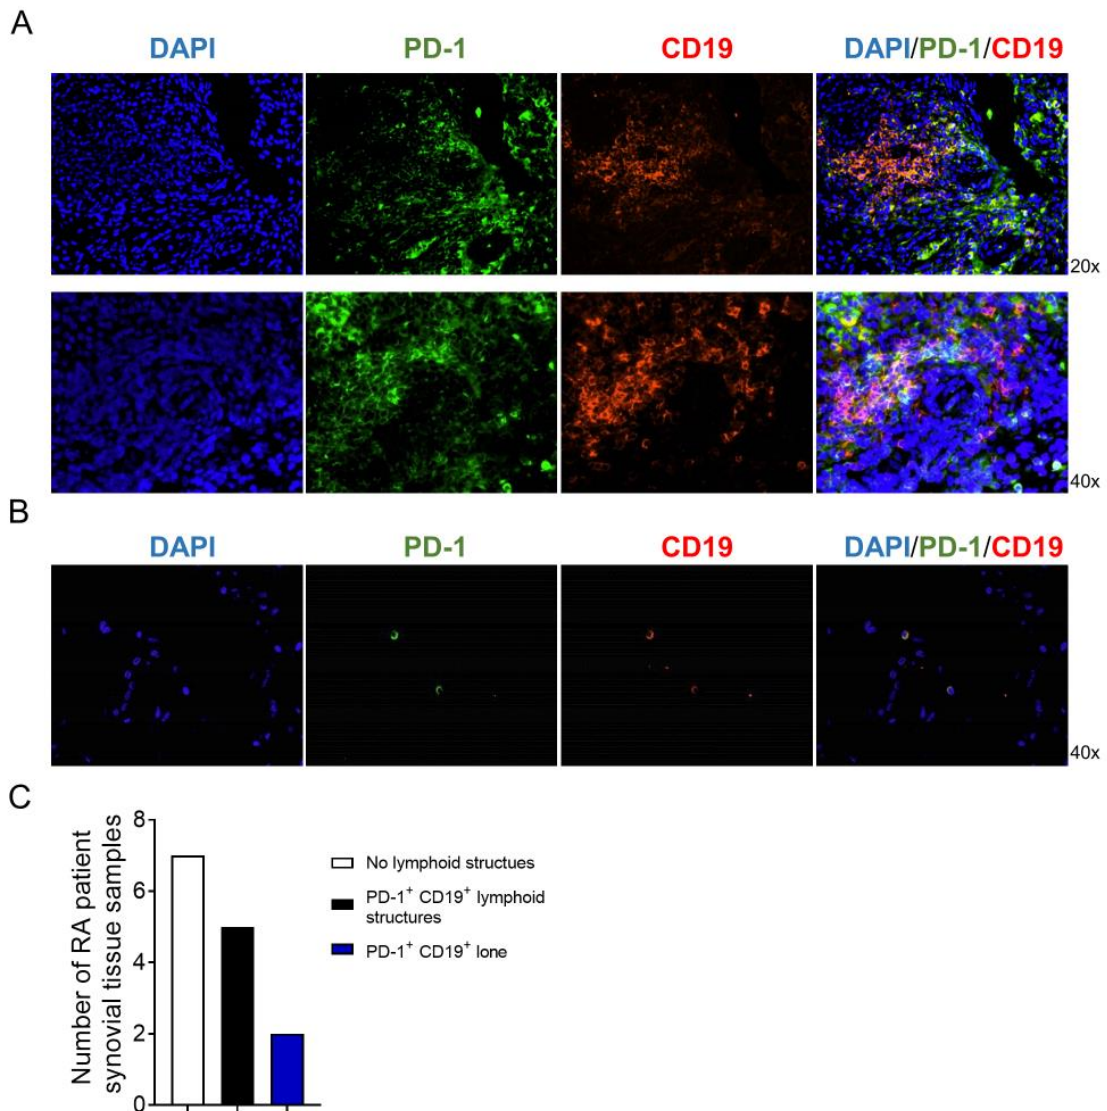

### Supplementary Figure 4. RA patient synovial tissue localisation of PD-1<sup>+</sup> B cells.

Immunofluorescence of RA patient synovial tissue samples for the identification of CD19<sup>+</sup> and PD-1<sup>+</sup> expressing cells. (A). Representative examples of CD19<sup>+</sup> and PD-1<sup>+</sup> expressing cells located in tertiary lymphoid organ-like formations. (B). Representative example of lone CD19<sup>+</sup> and PD-1<sup>+</sup> expressing cells in RA patient synovial tissue. (C). Summary of tissue samples analysed and distribution of CD19<sup>+</sup>PD-1<sup>+</sup> cells. A total of 13 RA patient synovial tissue samples were analysed, 5 showed accumulation of CD19<sup>+</sup>PD-1<sup>+</sup> in lymphoid like structures, 2 showed lone CD19<sup>+</sup>PD-1<sup>+</sup> cells and 7 showed no lymphoid like structure formation or CD19<sup>+</sup> cell synovial infiltration.

## Sup. Figure 5

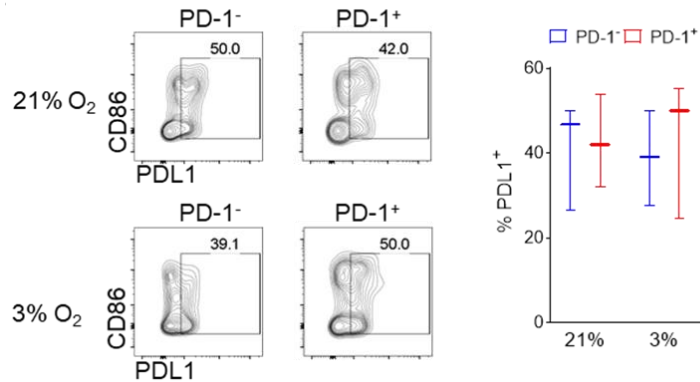

### Supplementary Figure 5. PDL1 expression by *in vitro* stimulated PD-1<sup>+</sup> and PD-1<sup>-</sup> RA patient derived B cells.

Representative flow cytometric analysis plots and frequency for the expression of PDL1 by PD-1<sup>+</sup> and PD-1<sup>-</sup> RA patient derived B cells following stimulation under normoxic or hypoxic conditions (n=3/group, two independent experiments) data are represented as a box-and-whisker plot, with bounds from 25th to 75th percentile, median line, and whiskers ranging from 5th to 95th percentile.. Statistical analysis was performed by using paired standard Student's t test, p<0.05\* were considered significant.

## Sup. Figure 6

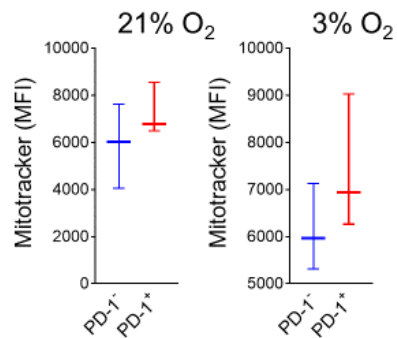

### Supplementary Figure 6. RA patient PD-1<sup>-</sup> and PD-1<sup>+</sup> B cell mitochondrial mass comparison.

Mittotracker MFI following flow cytometric analysis of RA patient derived PD-1<sup>-</sup> and PD-1<sup>+</sup> B cells following stimulation under normoxic or hypoxic conditions (n=3/group, two independent experiments) data are represented as a box-and-whisker plot, with bounds from 25th to 75th percentile, median line, and whiskers ranging from 5th to 95th percentile.. Statistical analysis was performed by using paired standard Student's t test, p<0.05\* were considered significant.

## Sup. Figure 7

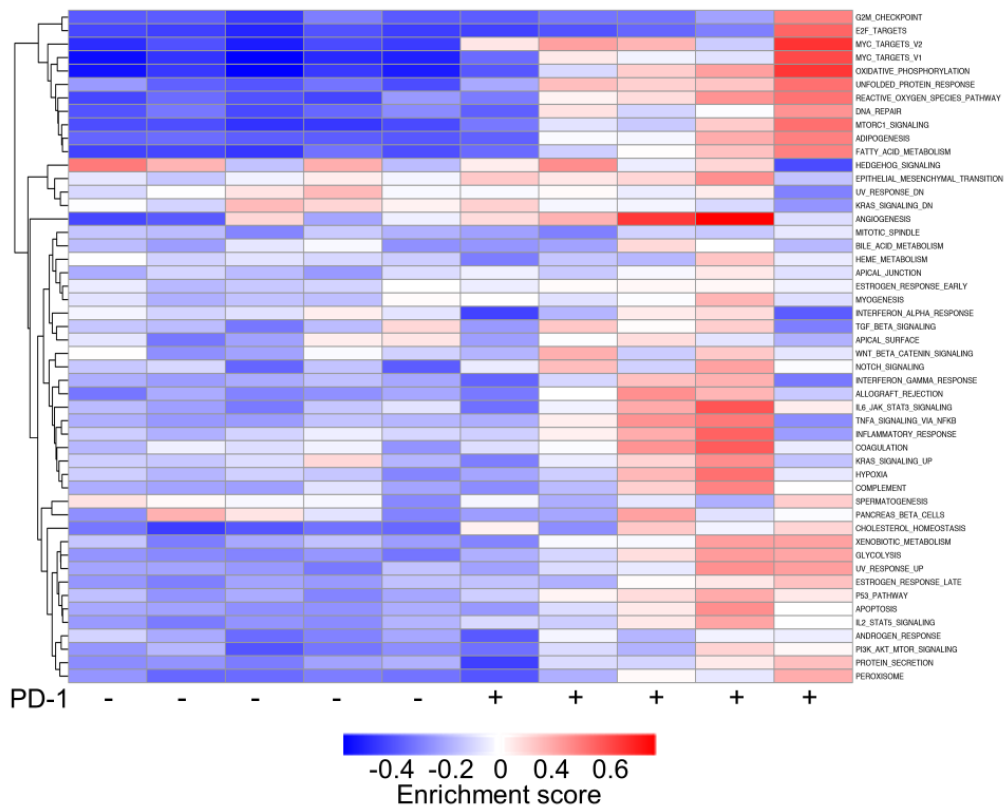

### Supplementary Figure 7. RNAseq pathway enrichment analysis of RA patient paired PD-1<sup>+</sup> and PD-1<sup>-</sup> B cells.

Flow sorted, *ex vivo* RA patient PD-1<sup>+</sup> and matched PD-1<sup>-</sup> B cells were subjected to RNAseq analysis followed by pathway analysis. Pathway analysis was performed by processing the list of differentially expressed genes using the Ingenuity Pathway Analysis (IPA) software (Qiagen). Only genes that differentially expressed with an FDR value of < 0.05 were used.

| <b>Target</b> | <b>Conjugate</b>     | <b>Clone</b> | <b>Supplier</b> |
|---------------|----------------------|--------------|-----------------|
| CD38          | Alexa Fluor 488      | HIT2         | BioLegend       |
| CD24          | PerCP-Cy5.5          | ML5          | BD Biosciences  |
| CD20          | APC                  | 2H7          | BD Biosciences  |
| CD80          | APC-R700             | 307.5        | BD Biosciences  |
| CD27          | Brilliant Violet 421 | O323         | BioLegend       |
| IgM           | Brilliant Violet 510 | G20-127      | BD Biosciences  |
| CD138         | Brilliant Violet 605 | MI15         | BioLegend       |
| CD45          | Brilliant Violet 650 | H130         | BioLegend       |
| CD19          | Brilliant Violet 711 | HIB19        | BioLegend       |
| MHC class II  | Brilliant Violet 786 | G46-6        | BD Biosciences  |
| CD269 (BCMA)  | PE                   | 19F2         | BioLegend       |
| CD40          | PE-CF594             | 5C3          | BioLegend       |
| CD86          | PE-Cy5               | IT2.2        | BD Biosciences  |
| IgD           | PE-Cy7               | 1A6-2        | BioLegend       |
| PD-1          | BV421                | NAT105       | BioLegend       |
| PD-1          | PE                   | NAT105       | BioLegend       |
| CD45          | PE-Cy5               | H130         | BioLegend       |
| CD45          | BV510                | H130         | BioLegend       |
| GLUT1         | PE                   | 202915       | Bio-Techne      |
| CXCR3         | PE                   | G025H7       | BioLegend       |
| CXCR3         | BV650                | G025H7       | BioLegend       |
| CD3           | BV786                | HIT3a        | BioLegend       |
| CCR7          | PE-CF594             | G043H7       | BioLegend       |
| CD8a          | PE-Cy5               | HIT8a        | BioLegend       |
| CD4           | PE-Cy7               | RPA-T4       | BioLegend       |
| CCR6          | BV711                | G034E3       | BioLegend       |
| CXCR5         | BV785                | J252D4       | BioLegend       |
| pSTAT3        | PE-CF594             | 4/P-STAT3    | BD              |
| PDL1          | BV650                | MIH1         | BD              |



|              |          |         |              |
|--------------|----------|---------|--------------|
| IL-1 $\beta$ | PE       | CRM56   | Thermofisher |
| AKT          | PD-CF594 | M89-61  | BD           |
| mTOR         | AF647    | O21-404 | BD           |
| S6           | AF488    | N7-548  | BD           |

**Supplementary table 1:** Characteristics of antibodies used for flow cytometric analysis. Sample acquisition was performed on a 4-laser BD LSR Fortessa II cell analyser.

| Figure and sample | CRP  | ESR | SJC28 | TJC28 | VAS | DAS28 |
|-------------------|------|-----|-------|-------|-----|-------|
| Figure 1F (1)     | 19.7 | 30  | 2     | 0     | 40  | 3.01  |
| Figure 1F (2)     | <1   | -   | 2     | 2     | 100 | 3.57  |
| Figure 1F (3)     | 53.6 | 98  | 4     | 6     | 60  | 5.18  |
| Figure 1F (4)     | 8    | 43  | 0     | 3     | 80  | 3.84  |
| Figure 1F (5)     | <1   | 2   | 1     | 0     | 10  | 1.39  |
| Figure 1F (6)     | 10.4 | 3   | 0     | 12    | 50  | 4.48  |
| Figure 3G (1)     | 10.4 | 3   | 0     | 12    | 50  | 4.48  |
| Figure 3G (2)     | 1    | 2   | 0     | 5     | 40  | 3.02  |
| Figure 3G (3)     | 6    | 17  | 0     | 1     | 12  | 2.39  |
| Figure 3G (4)     | 1.4  | 9   | 0     | 15    | 40  | 4     |

**Supplementary table 2:** Clinical information of RA patients for synovial tissue samples included in this study. C-reactive protein (CRP), erythrocyte sedimentation rate (ESR), swollen 28-joint count (SJC28), tender 28-joint count (TJC28) and visual analogue scale (VAS) at time of arthroscopy are shown.

| Figure and sample | CRP | ESR | SJC28 | TJC28 | VAS | DAS28 |
|-------------------|-----|-----|-------|-------|-----|-------|
| RNAseq sample 1   | 7   | 30  | 14    | 14    | -   | -     |
| RNAseq sample 2   | 9   | 17  | 5     | 3     | 75  | 4.43  |
| RNAseq sample 3   | 4   | 13  | 0     | 0     | 40  | 2.1   |
| RNAseq sample 4   | 2.5 | 27  | 6     | 6     | 30  | 3.89  |
| RNAseq sample 5   | 25  | 79  | 4     | 2     | 50  | 4.18  |

**Supplementary table 3:** Clinical information of RA patients, donors of B cells used in RNAseq analysis. C-reactive protein (CRP), erythrocyte sedimentation rate (ESR), swollen 28-joint count (SJC28), tender 28-joint count (TJC28) and visual analogue scale (VAS) at time of arthroscopy are shown.

## **Supplementary Methods:**

### ***Differential Expression Analysis.***

TPM count values obtained by pseudo alignment and quantification of raw read files (fastq's) with Kallisto were read into R using the *tximport* Bioconductor package, and transcript count values were summarized to gene level counts using the `summarizeToGene` command. The counts were then normalized for library size using edgeR's `calcNormFactors` function. Genes with low expression across samples were filtered out. Differential analysis was performed within edgeR by using edgeR's generalized linear model implementation (as embodied by the commands `glmQLFit` and `glmQLFTest`). In order to account for the pairwise origin of samples (i.e PD1+ and PD1- B cells were obtained in pairs from donors), and both a paired analysis accounting for the paired structure of the data and an unpaired analysis was performed. The paired analysis yielded approximately 1100 differentially expressed genes out of a total of approximately 16600 genes that were present after filtering. The unpaired analysis reported a smaller group of genes (~900) that were differentially expressed. Downstream pathway analysis was performed using the results from the paired analysis. A volcano plot of the differentially expressed genes is shown in Fig 6.

### ***Pathway Analysis.***

Pathway analysis was performed by processing the list of differentially expressed genes using the Ingenuity Pathway Analysis (IPA) software from Qiagen. Only genes that differentially expressed with an FDR value of  $< 0.05$  were used to perform the pathway analysis. In addition

to this, the differentially expressed genes that satisfied this FDR threshold were ranked by their significance and gene set enrichment analysis performed on them, using gene sets from the Broad Institute's MSigDb database.

Multiple pathway databases were used to test for enrichment, among them, were the database of GO terms as represented by MSigDb's c5.all.v.7.1, the canonical pathways database as represented by c2.cp.all.v.7.1 and the hallmarks of cancer database (h.all.v.7.1). There was common enrichment in gene sets or pathways related to the cell cycle (IPA: EIF2 signaling,  $p = 3 \times 10^{-58}$ , KEGG: Cell Cycle with NES=1.77, FDR = 0.002, Hallmarks: G2M Checkpoint, NES=1.96, FDR = 0.004 & E2F Targets, NES=1.82, FDR = 0.004). Furthermore, there was common enrichment in the Glycolysis and Oxidative phosphorylation pathways as stated in the main text.

To understand heterogeneity in signaling between samples, single sample pathway enrichment analysis was performed using the GSVA (gene set variation analysis) method as implemented in the R/Bioconductor package of the same name, using the same gene set databases as used for GSEA. To illustrate these results, a heatmap of the GSVA enrichment is shown for the Hallmark gene set. We also show in the table below, results of the GSEA analysis of the differentially expressed genes.

| NAME                            | SIZE | NES       | NOM p-val  | FDR q-val  | FWER p-val | RANK AT MAX |
|---------------------------------|------|-----------|------------|------------|------------|-------------|
| HALLMARK_G2M_CHECKPOINT         | 27   | 1.9724258 | 0          | 0          | 0          | 127         |
| HALLMARK_INFLAMMATORY_RESPONSE  | 22   | 1.7869042 | 0          | 0.01079322 | 0.019      | 107         |
| HALLMARK_E2F_TARGETS            | 30   | 1.777163  | 0.00105042 | 0.00862043 | 0.023      | 86          |
| HALLMARK_ESTROGEN_RESPONSE_LATE | 21   | 1.7480316 | 0.00442478 | 0.00835823 | 0.03       | 131         |
| HALLMARK_ALLOGRAFT_REJECTION    | 27   | 1.5741361 | 0.00853789 | 0.07547446 | 0.286      | 163         |

|                                  |    |           |            |            |       |     |
|----------------------------------|----|-----------|------------|------------|-------|-----|
| HALLMARK_TNFA_SIGNALING_VIA_NFKB | 27 | 1.5510603 | 0.02136752 | 0.07770276 | 0.342 | 190 |
| HALLMARK_APOPTOSIS               | 18 | 1.4774623 | 0.06081081 | 0.12813708 | 0.573 | 143 |
| HALLMARK_IL2_STAT5_SIGNALING     | 31 | 1.380032  | 0.09957627 | 0.24689725 | 0.856 | 278 |
| HALLMARK_GLYCOLYSIS              | 26 | 1.3773723 | 0.1025641  | 0.22290102 | 0.859 | 373 |
| HALLMARK_COMPLEMENT              | 16 | 1.313388  | 0.16836159 | 0.2951678  | 0.955 | 298 |
